# Supplementary material for: Health management and pattern analysis of daily living activities of people with dementia using in-home sensors and machine learning techniques
Source: PubMed Central journal article supplement (PMC5933790; doi:10.1371/journal.pone.0195605), 2018-05-03
Supplement: pone.0195605.s001.pdf [file pone.0195605.s001.pdf]

## Supporting information

---

### S1 Algorithm: Anomaly detection algorithm

---

1. Filter and pre-process the original data. This includes defining a common sampling rate for the given environmental sensors (e.g. one sample per minute)
  2. Aggregate the integrated data within ten minutes intervals (each day is represented via  $144(24 \times 6)$  windows and each window is an array of  $n$  observations)
  3. Cluster the daily data into categories; In this case to  $D1$  and  $D2$  (low-active and high-active days)
  4. Cluster individual windows in order to map each window into a single state, i.e. the data is distilled into a discrete format: at time interval  $\tau_t$  the user is in state  $s_i$ .
  5. Separate the historical data into training, verification and test datasets. In this experiment we have used training (%50), verification (%20), and test sets (%30)
  6. Construct the Markov chain model for each cluster and learn the corresponding training transition matrices
  7. Calculate the entropy rate  $\xi_T$  via Eq. (4)
  8. Repeat steps 3-4 for the verification set and calculate the entropy rate for each day in this dataset
  9. Determine a confidence interval (expected variation) for entropy rate values, see Eq. (5)
  10. Repeat steps 3-4 for the test data, calculate the entropy rate, and compare with the confidence interval to detect anomalies
-
