# Supplementary material for: Health management and pattern analysis of daily living activities of people with dementia using in-home sensors and machine learning techniques
Source: PubMed Central journal article supplement (PMC5933790; doi:10.1371/journal.pone.0195605), 2018-05-03
Supplement: pone.0195605.s002.pdf [file pone.0195605.s002.pdf]

## Supporting information

---

**S2 Algorithm:** Decision Scoring by the Expert System

---

**Input:** Aggregated hourly measurements  $O_i$  reported by  $CS_i$ , Clinical Thresholds  $T_i^H$  and  $T_i^L$  for respective  $CS_i \quad \forall i \in G_1$

**Output:** Decision score  $D_{CS}$

**Data:** Fetch Clinical thresholds  $T_i^H$  and  $T_i^L$  from the database, where  $H$  and  $L$  indicate higher and lower thresholds values

**Initialise**  $D_{CS}$  to 0

**foreach**  $CS_i$  **do**

Compare the  $O_i$  against the thresholds  $T_i^H$  and  $T_i^L$

**if**  $O_i$  lies outside the range **then** Increment  $D_{CS}$  value

**else** Do not change the  $D_{CS}$  value

**end**

---
